# Supplementary material
Source: PubMed Central journal article supplement (PMC6688491)
Supplement: NIHMS1035703-supplement-Supplemental.pdf [file NIHMS1035703-supplement-Supplemental.pdf]

|       | MDA468    |        | TMD231    |        |
|-------|-----------|--------|-----------|--------|
|       | shControl | shMdm2 | shControl | shMdm2 |
| G0/G1 | 51.7      | 57.6   | 55.2      | 61.3   |
| S     | 11.2      | 10.9   | 16.7      | 13.7   |
| G2/M  | 34.0      | 30.3   | 14.5      | 21.5   |

**Table S1 Knock-down of Mdm2 does not affect cell cycle.**

Cell cycle analysis of MDA468 and TMD-231 cells that were serum starved for 24 h. followed by replacement of media with Complete DMEM (MDA468) or addition of 1% serum for 8 hours.

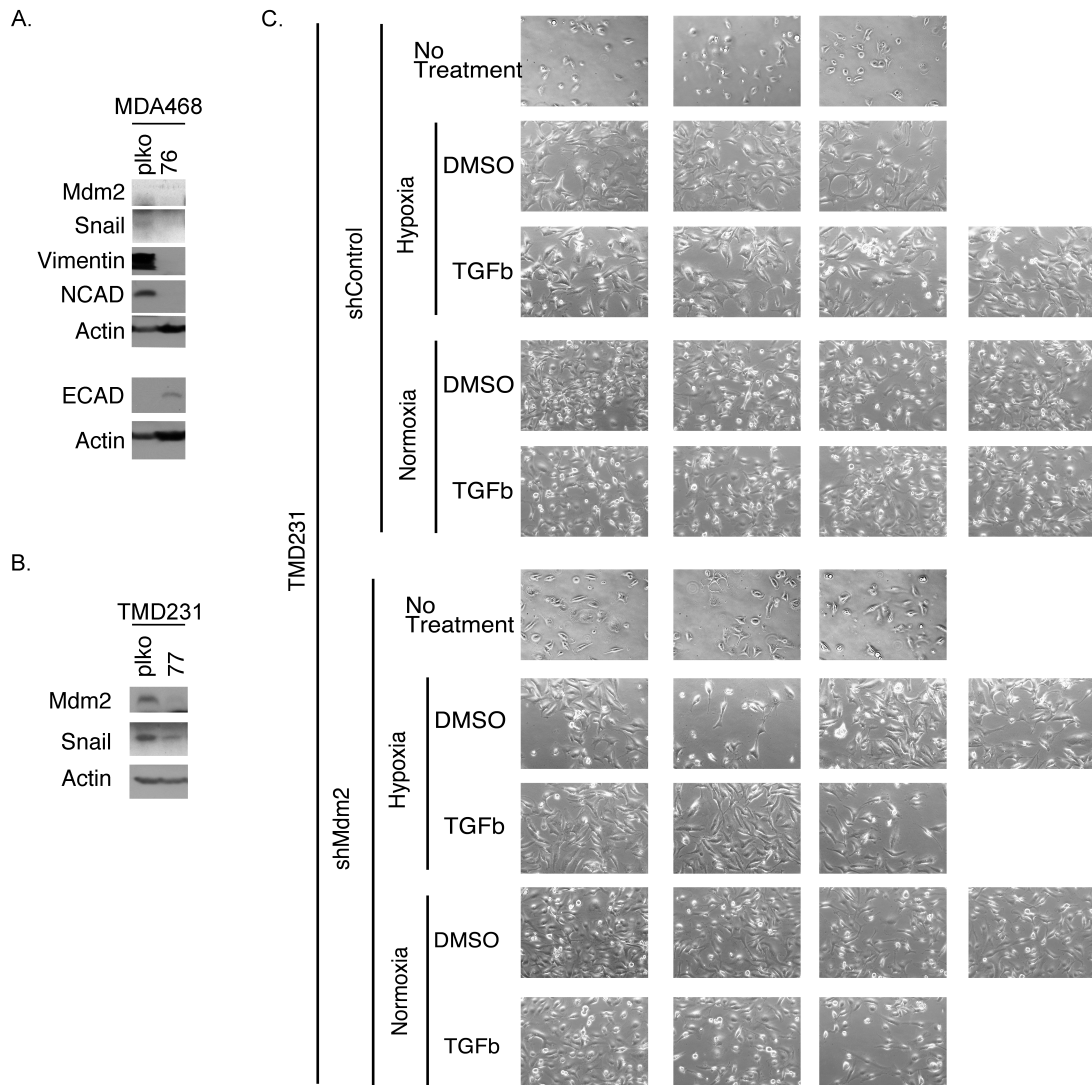

**Fig. S1. Characterization of EMT in shMdm2 cell lines. A.** MDA468 and **B** TMD231 cell lines generated from distinct shMdm2 constructs (TRCN0000003376 and TRCN0000003377 respectively) show similar changes in EMT marker levels as described in Figure 1 by western blot. **C.** TMD231 cells do not undergo substantial morphological changes upon TGF $\beta$ 1 or hypoxia treatment. shControl and shMdm2 cells were treated with DMSO or TGF $\beta$ 1 under normoxia or hypoxia as described in the methods.

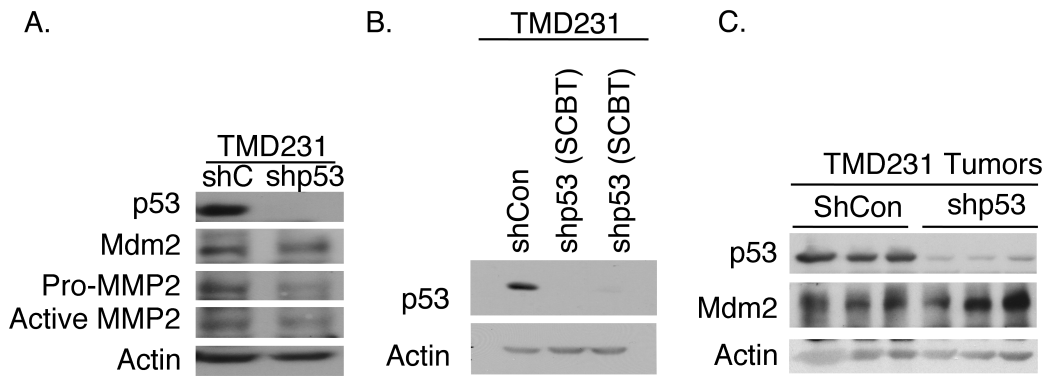

**Fig. S2. Western blots of TMD231 cells with knocked-down p53 and shControl cells.** **A.** Western blot of cells described in Figures 4 and 5 **B.** Western blot generated from cells transduced with different shp53 constructs. **C.** Western blot of *In vivo* tumors for Mdm2, p53 and Actin.
