# Supplementary material
Source: PubMed Central journal article supplement (PMC6688491)

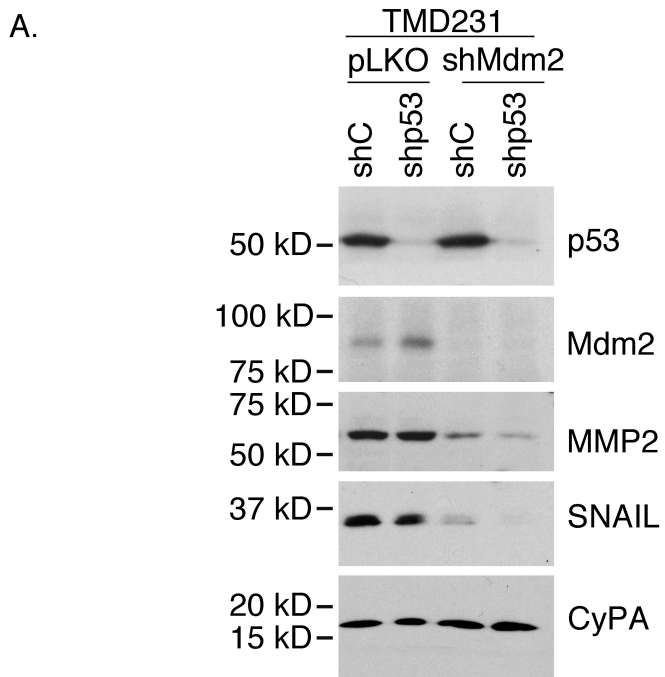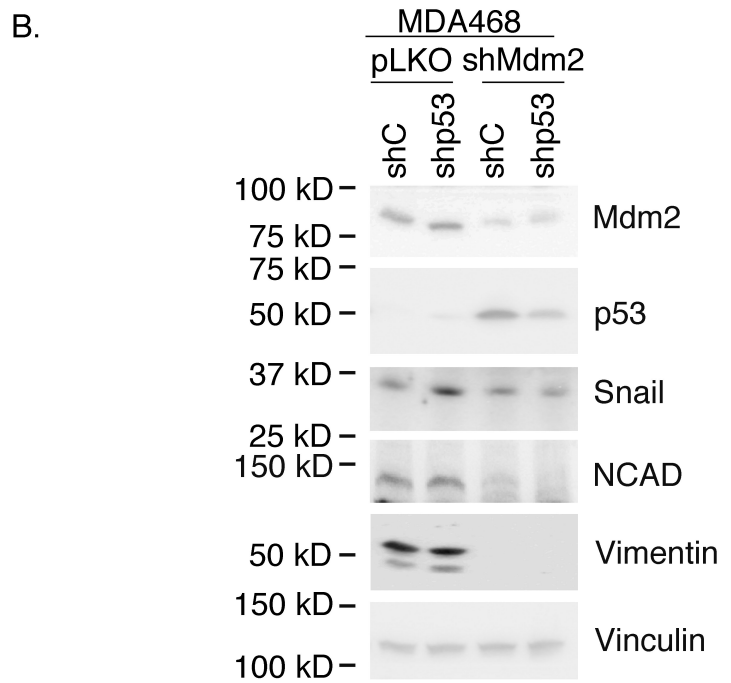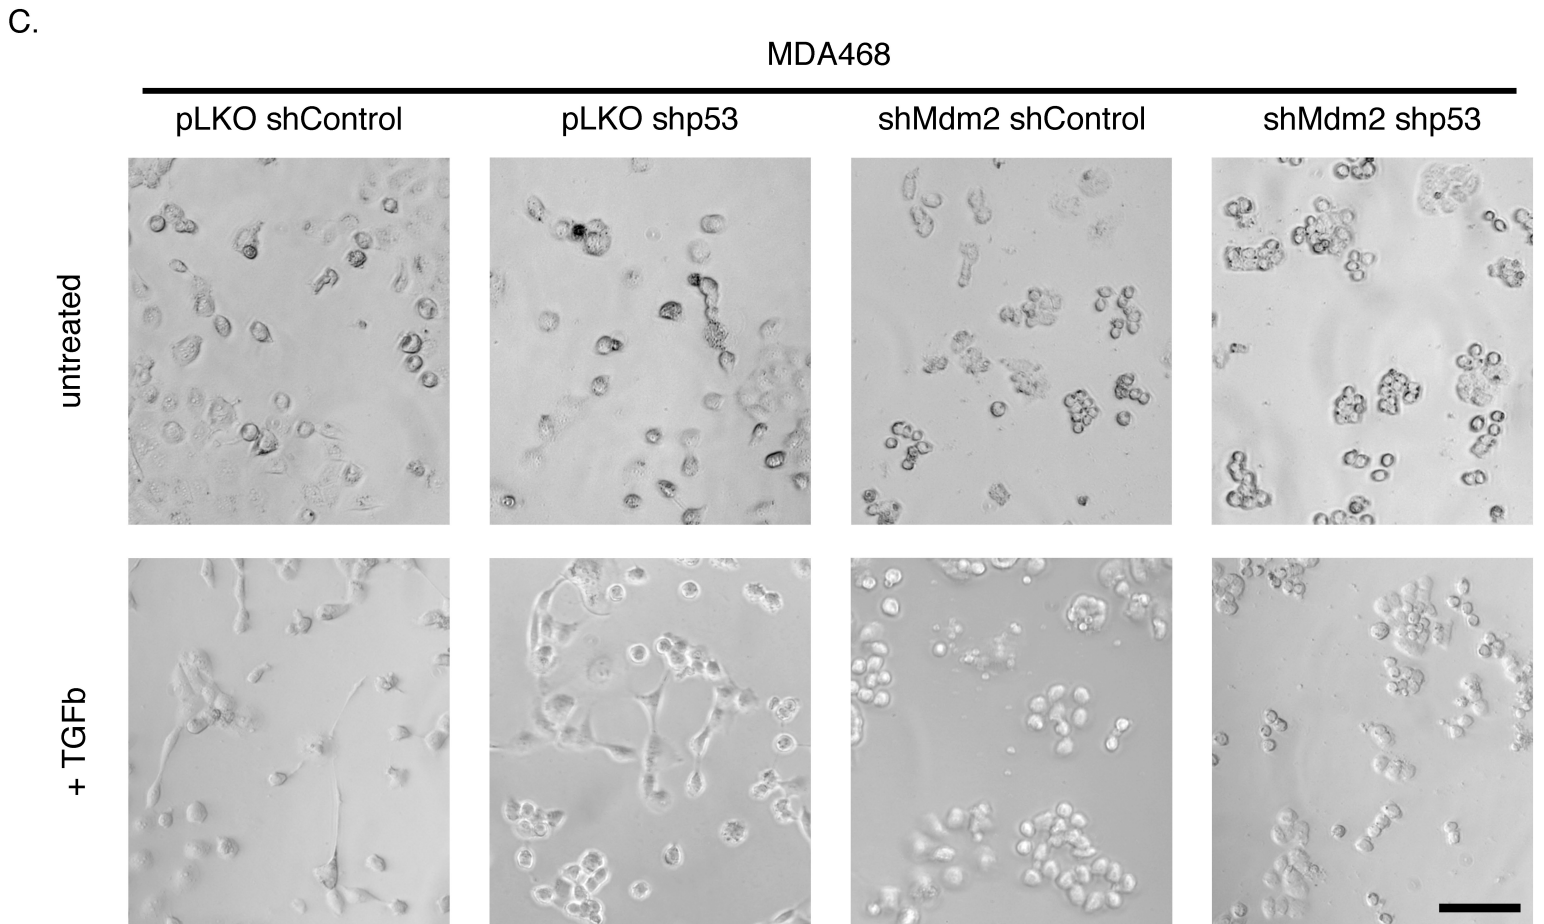

Supplement: NIHMS1035703-supplement-s3.pdf [file NIHMS1035703-supplement-s3.pdf]
